# Supplementary material for: Risk Assessment of Nitrite and Nitrate Intake from Processed Meat Products: Results from the Hellenic National Nutrition and Health Survey (HNNHS)
Source: MDPI journal article supplement (doi:10.3390/ijerph191912800), 2022-10-06
Supplement: s1 [file s1]

**Table S1.** Food groups and items (including composite disks and recipes) involved in the exposure assessment.

|                                                       |
|-------------------------------------------------------|
| <b>FOODEX Category</b>                                |
| <b>Food group (if different than FOODEX Category)</b> |
| <b>Food subgroup (if any)</b>                         |
| <b>x. FoodEx2 Code &amp; Term</b>                     |
| HNNHS Foods                                           |
| <b>PRESERVED MEAT</b>                                 |
| <b>Pork Meat</b>                                      |
| <b>Pork meat, Bacon</b>                               |
| <b>1. A022X Bacon</b>                                 |
| Caesar salad                                          |
| Cheese soufflé                                        |
| Processed meat products, bacon                        |
| Crepes                                                |
| Hamburger                                             |
| Lasagna soufflé                                       |
| Omelet                                                |
| Pasta au gratin                                       |
| Pasta carbonara                                       |
| Peinirli ("pizza boat")                               |
| Pizza                                                 |
| Potatoes au gratin                                    |
| Sandwich                                              |
| Soup                                                  |
| Tart                                                  |
| Toast                                                 |
| <b>Pork meat, Ham</b>                                 |
| <b>2. A022T Ham, pork</b>                             |
| Caesar salad                                          |
| Cheese soufflé                                        |
| Chef salad                                            |
| Chicken with ham                                      |
| Processed meat products, ham                          |
| Crepes                                                |
| Croissant                                             |
| Lasagna soufflé                                       |
| Omelet                                                |
| Pasta au gratin                                       |
| Peinirli ("pizza boat")                               |
| Pie                                                   |
| Pizza                                                 |
| Sandwich                                              |
| Toast                                                 |
| Tortilla sandwich                                     |
| <b>3. A023K Cooked pork ham</b>                       |
| Caesar salad                                          |

---

**FOODEX Category****Food group (if different than FOODEX Category)****Food subgroup (if any)****x. FoodEx2 Code & Term**

HNNHS Foods

---

Chef salad

Processed meat products, ham

Crepes

Lasagna soufflé

Peinirli ("pizza boat")

Pie

Pizza

Sandwich

---

**Pork meat, other**

---

**4. A022S Cured seasoned pork meat**

Caesar salad

Chef salad

Crepes

Pasta au gratin

Pie

Pizza

Sandwich

Processed meat products

Processed meat products, prosciutto

Toast

Meat preserved with salt, "apaki"

Meat preserved with salt, pork

**5. A023H Cooked cured (or seasoned) pork meat**

Processed meat products

Toast

Tortilla sandwich

Pizza

Sandwich

Processed meat products, prosciutto

Crepes

---

**Poultry meat**

---

**Poultry meat, Chicken**

---

**6. A023S Cooked cured (or seasoned) poultry meat**

Processed meat products, chicken

Sandwich

Toast

**7. A023X Cooked other poultry meat**

Processed meat products, chicken

---

**Poultry meat, Turkey**

---

**8. A023E Cured seasoned poultry meat**

Processed meat products, turkey

Pasta carbonara

---

**FOODEX Category****Food group (if different than FOODEX Category)****Food subgroup (if any)****x. FoodEx2 Code & Term**

HNNHS Foods

Sandwich

Toast

**9. A023T Cooked turkey meat**

Processed meat products, turkey

Crepes

Croissant

Omelet

Pasta carbonara

Pizza

Salad

Sandwich

Toast

Tomato sauce

Tortilla sandwich

---

**SAUSAGES****10. A0EYP Preserved or partly preserved sausages**

Beans

Peinirli ("pizza boat")

Pie

Piroshky

Pizza

Sandwich

Sausage

Sausage, breakfast type

"Spetsofai" (Sausages with peppers)

Tomato sauce

Sausage, soutzouki

Sausage, turkey

Sausage, tzoumagias-type

Sausage, village type

Toast

Sausage, cocktail-type

**11. A025C Chorizo and similar**

Paella

**12. A026B Frankfurt-type sausage**

Hot dog

Sandwich

Sausage, Frankfurt

Tomato sauce

**13. A025Q Mortadella-type sausage**

Processed meat products, mortadella

Sandwich

Toast

---

**FOODEX Category**

**Food group (if different than FOODEX Category)**

**Food subgroup (if any)**

**x. FoodEx2 Code & Term**

HNNHS Foods

---

**14. A025B Pepperoni/paprika-type sausage**

Pizza

**15. A024X Salami-type sausage**

Processed meat products, air-dried salami

Processed meat products, Hellenic-type salami

Processed meat products, salami

Processed meat products, salami Hungarian type

Omelet

Pizza

Sandwich

Sausage, beer salami

Sausage, salami

Souvlaki

Toast

---

**MEAT SPECIALTIES**

---

**16. A026M Liver based spreadable-textured specialties**

Pate and meat pastes, pate, duck liver

Pate and meat pastes, pate, other poultry liver

**17. A026Q Pate, chicken liver**

Pate and meat pastes, pate, chicken liver

**Table S2.** Frequency of processed meat products and mixed dishes/recipes containing processed meat products in HNNHS.

| <b>Foods/Mixed Dishes/Recipes</b>               | <b>Frequency in HNNHS (%)</b> |
|-------------------------------------------------|-------------------------------|
| <b>Foods</b>                                    | <b>24.91%</b>                 |
| Processed meat products                         | 1.85%                         |
| Processed meat products, turkey                 | 10.92%                        |
| Processed meat products, air-dried salami       | 0.87%                         |
| Processed meat products, bacon                  | 0.34%                         |
| Processed meat products, chicken                | 1.08%                         |
| Processed meat products, ham                    | 4.35%                         |
| Processed meat products, Hellenic salami        | 0.08%                         |
| Processed meat products, loin                   | 0.44%                         |
| Processed meat products, mortadella             | 0.36%                         |
| Processed meat products, prosciutto             | 0.20%                         |
| Processed meat products, salami                 | 0.03%                         |
| Processed meat products, salami Hungarian type  | 0.08%                         |
| Pate and meat pastes, pate, chicken liver       | 0.08%                         |
| Pate and meat pastes, pate, duck liver          | 0.03%                         |
| Pate and meat pastes, pate, other poultry liver | 0.06%                         |
| Meat preserved with salt, "apaki"               | 0.11%                         |
| Meat preserved with salt, pork                  | 0.06%                         |
| Sausages                                        | 1.65%                         |
| Sausage, beer salami                            | 0.06%                         |
| Sausage, breakfast type                         | 0.03%                         |
| Sausage, cocktail                               | 0.08%                         |
| Sausage, Frankfurt                              | 0.08%                         |
| Sausage, salami                                 | 0.08%                         |
| Sausage, soutzouki                              | 0.14%                         |
| Sausage, turkey                                 | 0.14%                         |
| Sausage, tzoumagias-type                        | 0.59%                         |
| Sausage, village type                           | 1.12%                         |
| <b>Mixed dishes/Recipes</b>                     | <b>75.09%</b>                 |
| Beans                                           | 0.03%                         |
| Caesar salad                                    | 0.47%                         |
| Cheese soufflé                                  | 0.06%                         |
| Chef salad                                      | 0.28%                         |
| Chicken with ham                                | 0.56%                         |
| Crepes                                          | 1.43%                         |
| Croissant                                       | 0.64%                         |
| Hamburger                                       | 0.59%                         |
| Hot dog                                         | 0.73%                         |
| Lasagna soufflé                                 | 1.42%                         |
| Omelet                                          | 0.36%                         |
| Paella                                          | 0.42%                         |
| Pasta au gratin                                 | 1.59%                         |
| Pasta carbonara                                 | 1.71%                         |

| <b>Foods/Mixed Dishes/Recipes</b>   | <b>Frequency in HNNHS (%)</b> |
|-------------------------------------|-------------------------------|
| Peinirli (“pizza boat”)             | 1.01%                         |
| Pie                                 | 4.13%                         |
| Piroshky                            | 0.45%                         |
| Pizza                               | 14.24%                        |
| Potatoes au gratin                  | 0.17%                         |
| Salad                               | 0.03%                         |
| Sandwich                            | 7.58%                         |
| Soup                                | 0.03%                         |
| “Spetsofai” (Sausages with peppers) | 0.36%                         |
| Tart                                | 0.03%                         |
| Toast                               | 36.61%                        |
| Tomato sauce                        | 0.12%                         |
| Tortilla sandwich                   | 0.03%                         |
| Souvlaki                            | 0.03%                         |
| <b>Total</b>                        | <b>100.00%</b>                |

**Table S3.** Concentration levels of nitrite (E 249-250) and nitrate (E 251-252) used in the regulatory maximum level scenario (mg/kg).

| Food category number | Food category name             | FOODEX category  | FOODEX Code | FOODEX Name                                 | Frequency in HNNHS % | NITRITE MPL (mgkg) | NITRATE MPL (mgkg) |
|----------------------|--------------------------------|------------------|-------------|---------------------------------------------|----------------------|--------------------|--------------------|
| 08.3.1               | Non-heat-treated meat products | Preserved meat   | A022S       | Cured seasoned pork meat                    | 1.08                 | 150                | 150                |
| 08.3.1               | Non-heat-treated meat products | Preserved meat   | A022X       | Bacon                                       | 9.02                 | 150                | 150                |
| 08.3.1               | Non-heat-treated meat products | Preserved meat   | A023E       | Cured seasoned poultry meat                 | 3.26                 | 150                | 150                |
| 08.3.1               | Non-heat-treated meat products | Sausages         | A024X       | Salami-type sausage                         | 1.77                 | 150                | 150                |
| 08.3.1               | Non-heat-treated meat products | Sausages         | A025B       | Pepperoni/paprika-type sausage              | 0.63                 | 150                | 150                |
| 08.3.1               | Non-heat-treated meat products | Sausages         | A025C       | Chorizo and similar                         | 0.41                 | 150                | 150                |
| <b>08.3.1</b>        | <b>Total</b>                   |                  |             |                                             | <b>16.17</b>         |                    |                    |
| 08.3.2               | Heat-treated meat products     | Preserved meat   | A022T       | Ham, pork                                   | 23.97                | 150                |                    |
| 08.3.2               | Heat-treated meat products     | Preserved meat   | A023H       | Cooked cured (or seasoned) pork meat        | 21.13                | 150                |                    |
| 08.3.2               | Heat-treated meat products     | Preserved meat   | A023K       | Cooked pork ham                             | 2.43                 | 150                |                    |
| 08.3.2               | Heat-treated meat products     | Preserved meat   | A023S       | Cooked cured (or seasoned) poultry meat     | 1.38                 | 150                |                    |
| 08.3.2               | Heat-treated meat products     | Preserved meat   | A023T       | Cooked turkey meat                          | 25.71                | 150                |                    |
| 08.3.2               | Heat-treated meat products     | Preserved meat   | A023X       | Cooked other poultry meat                   | 0.08                 | 150                |                    |
| 08.3.2               | Heat-treated meat products     | Sausages         | A025Q       | Mortadella-type sausage                     | 0.63                 | 150                |                    |
| 08.3.2               | Heat-treated meat products     | Sausages         | A026B       | Frankfurt-type sausage                      | 0.86                 | 150                |                    |
| 08.3.2               | Heat-treated meat products     | Meat specialties | A026Q       | Pate, chicken liver                         | 0.08                 | 150                |                    |
| 08.3.2               | Heat-treated meat products     | Meat specialties | A026M       | Liver based spreadable-textured specialties | 0.08                 | 150                |                    |
| 08.3.2               | Heat-treated meat products     | Sausages         | A0EYP       | Preserved or partly preserved sausages      | 7.48                 | 150                |                    |
| <b>08.3.2</b>        | <b>Total</b>                   |                  |             |                                             | <b>83.83</b>         |                    |                    |
| <b>TOTAL</b>         |                                |                  |             |                                             | <b>100.00</b>        |                    |                    |

**Table S4.** Dietary daily intakes of nitrate, nitrite and combined nitrite and nitrate via processed meat products using different nitrate-to-nitrite conversion factors (a) for general population and (b) for consumers only.

| Population                                                      | Intakes                                                                               | Median (IQR)         | p90   | p95   |
|-----------------------------------------------------------------|---------------------------------------------------------------------------------------|----------------------|-------|-------|
| <b>General population (N=4532)</b>                              | Nitrate (mg/kg bw/day)                                                                | 0 (0, 0)             | 0     | 0.003 |
|                                                                 | Nitrite (mg/kg bw/day)                                                                | 0 (0, 0.007)         | 0.023 | 0.048 |
|                                                                 | Nitrite and nitrate with nitrate-to-nitrite conversion factor of 1% (mg/kg bw/day)    | 0 (0, 0.007))        | 0.023 | 0.048 |
|                                                                 | Nitrite and nitrate, with nitrate-to-nitrite conversion factor of 2.3% (mg/kg bw/day) | 0 (0, 0.007))        | 0.024 | 0.048 |
|                                                                 | Nitrite and nitrate, with nitrate-to-nitrite conversion factor of 9% (mg/kg bw/day)   | 0 (0, 0.007)         | 0.023 | 0.049 |
|                                                                 | Nitrite and nitrate intake <sup>1</sup> (% ADI <sup>2</sup> )                         | 0 (0, 10.0)          | 32.9  | 70.0  |
| <b>Consumers only (N=2152, 47.5% of the general population)</b> | Nitrate (mg/kg bw/day)                                                                | 0 (0, 0)             | 0.003 | 0.012 |
|                                                                 | Nitrite (mg/kg bw/day)                                                                | 0.007 (0.003, 0.020) | 0.050 | 0.082 |
|                                                                 | Nitrite and nitrate with nitrate-to-nitrite conversion factor of 1% (mg/kg bw/day)    | 0.007 (0.003, 0.020) | 0.050 | 0.082 |
|                                                                 | Nitrite and nitrate, with nitrate-to-nitrite conversion factor of 2.3% (mg/kg bw/day) | 0.007 (0.003, 0.020) | 0.050 | 0.083 |
|                                                                 | Nitrite and nitrate, with nitrate-to-nitrite conversion factor of 9% (mg/kg bw/day)   | 0.007 (0.003, 0.020) | 0.051 | 0.083 |
|                                                                 | Nitrite and nitrate intake <sup>1</sup> (% ADI <sup>2</sup> )                         | 10.0 (4.3, 28.6)     | 72.9  | 118.6 |

<sup>1.</sup> Using nitrate-to-nitrite conversion factor of 9%

<sup>2.</sup> ADI of 0.07mg/kg bw/day for nitrite



**Table S5.** Distribution of daily nitrite intake (in mg/kg bw/day and as %of ADI), estimated in total and per sex and age group for consumers only.

| Age group (years)      | N           | %           | Daily nitrite intake (mg/kg bw/day) |              |              |              |              |                  |              |              | Contribution to ADI (%) |             |             |              |              |                  |             |             |
|------------------------|-------------|-------------|-------------------------------------|--------------|--------------|--------------|--------------|------------------|--------------|--------------|-------------------------|-------------|-------------|--------------|--------------|------------------|-------------|-------------|
|                        |             |             | p25                                 | p50          | p75          | p90          | p95          | p99 <sup>1</sup> | Mean         | SD           | p25                     | p50         | p75         | p90          | p95          | p99 <sup>1</sup> | Mean        | SD          |
| <b>FEMALES</b>         | <b>1144</b> | <b>53.3</b> | <b>0.003</b>                        | <b>0.007</b> | <b>0.018</b> | <b>0.044</b> | <b>0.067</b> | <b>0.309</b>     | <b>0.022</b> | <b>0.064</b> | <b>4.3</b>              | <b>10.0</b> | <b>25.7</b> | <b>62.9</b>  | <b>95.7</b>  | <b>441.4</b>     | <b>31.4</b> | <b>91.4</b> |
| <b>Minors (&lt;18)</b> | <b>170</b>  | <b>14.8</b> | <b>0.005</b>                        | <b>0.014</b> | <b>0.032</b> | <b>0.062</b> | <b>0.134</b> | 0.359            | <b>0.032</b> | <b>0.065</b> | <b>7.1</b>              | <b>20.0</b> | <b>45.7</b> | <b>88.6</b>  | <b>191.4</b> | 512.9            | <b>45.7</b> | <b>92.9</b> |
| Children (0-9)         | 85          | 7.4         | 0.006                               | 0.019        | 0.034        | 0.081        | 0.161        | 0.359            | 0.037        | 0.059        | 8.6                     | 27.1        | 48.6        | 115.7        | 230.0        | 512.9            | 52.9        | 84.3        |
| Adolescents (10-17)    | 85          | 7.4         | 0.004                               | 0.011        | 0.024        | 0.051        | 0.076        | 0.608            | 0.027        | 0.070        | 5.7                     | 15.7        | 34.3        | 72.9         | 108.6        | 868.6            | 38.6        | 100.0       |
| <b>Adults (≥18)</b>    | <b>974</b>  | <b>85.2</b> | <b>0.003</b>                        | <b>0.007</b> | <b>0.015</b> | <b>0.038</b> | <b>0.064</b> | <b>0.309</b>     | <b>0.020</b> | <b>0.064</b> | <b>4.3</b>              | <b>10.0</b> | <b>21.4</b> | <b>54.3</b>  | <b>91.4</b>  | <b>441.4</b>     | <b>28.6</b> | <b>91.4</b> |
| Young adults (18-30)   | 442         | 38.7        | 0.003                               | 0.008        | 0.019        | 0.048        | 0.077        | 0.332            | 0.025        | 0.081        | 4.3                     | 11.4        | 27.1        | 68.6         | 110.0        | 474.3            | 35.7        | 115.7       |
| Adults (31-50)         | 348         | 30.4        | 0.003                               | 0.007        | 0.015        | 0.034        | 0.057        | 0.181            | 0.017        | 0.042        | 4.3                     | 10.0        | 21.4        | 48.6         | 81.4         | 258.6            | 24.3        | 60.0        |
| Older adults (51-64)   | 129         | 11.3        | 0.002                               | 0.004        | 0.012        | 0.028        | 0.045        | 0.076            | 0.014        | 0.054        | 2.9                     | 5.7         | 17.1        | 40.0         | 64.3         | 108.6            | 20.0        | 77.1        |
| Elderly (≥65)          | 55          | 4.8         | 0.002                               | 0.004        | 0.011        | 0.038        | 0.067        | 0.073            | 0.011        | 0.018        | 2.9                     | 5.7         | 15.7        | 54.3         | 95.7         | 104.3            | 15.7        | 25.7        |
| <b>MALES</b>           | <b>1001</b> | <b>46.7</b> | <b>0.003</b>                        | <b>0.007</b> | <b>0.022</b> | <b>0.058</b> | <b>0.098</b> | <b>0.220</b>     | <b>0.023</b> | <b>0.049</b> | <b>4.3</b>              | <b>10.0</b> | <b>31.4</b> | <b>82.9</b>  | <b>140.0</b> | <b>314.3</b>     | <b>32.9</b> | <b>70.0</b> |
| <b>Minors (&lt;18)</b> | <b>206</b>  | <b>20.6</b> | <b>0.006</b>                        | <b>0.014</b> | <b>0.030</b> | <b>0.075</b> | <b>0.126</b> | 0.195            | <b>0.029</b> | <b>0.042</b> | <b>8.6</b>              | <b>20.0</b> | <b>42.9</b> | <b>107.1</b> | <b>180.0</b> | 278.6            | <b>41.4</b> | <b>60.0</b> |
| Children (0-9)         | 105         | 10.5        | 0.009                               | 0.020        | 0.046        | 0.115        | 0.177        | 0.195            | 0.040        | 0.051        | 12.9                    | 28.6        | 65.7        | 164.3        | 252.9        | 278.6            | 57.1        | 72.9        |
| Adolescents (10-17)    | 101         | 10.1        | 0.003                               | 0.010        | 0.023        | 0.048        | 0.072        | 0.106            | 0.019        | 0.026        | 4.3                     | 14.3        | 32.9        | 68.6         | 102.9        | 151.4            | 27.1        | 37.1        |
| <b>Adults (≥18)</b>    | <b>795</b>  | <b>79.4</b> | <b>0.003</b>                        | <b>0.006</b> | <b>0.019</b> | <b>0.054</b> | <b>0.090</b> | <b>0.296</b>     | <b>0.022</b> | <b>0.051</b> | <b>4.3</b>              | <b>8.6</b>  | <b>27.1</b> | <b>77.1</b>  | <b>128.6</b> | <b>422.9</b>     | <b>31.4</b> | <b>72.9</b> |
| Young adults (18-30)   | 338         | 33.8        | 0.003                               | 0.008        | 0.023        | 0.058        | 0.097        | 0.319            | 0.025        | 0.056        | 4.3                     | 11.4        | 32.9        | 82.9         | 138.6        | 455.7            | 35.7        | 80.0        |
| Adults (31-50)         | 313         | 31.3        | 0.003                               | 0.007        | 0.019        | 0.061        | 0.099        | 0.220            | 0.023        | 0.054        | 4.3                     | 10.0        | 27.1        | 87.1         | 141.4        | 314.3            | 32.9        | 77.1        |
| Older adults (51-64)   | 82          | 8.2         | 0.002                               | 0.004        | 0.007        | 0.042        | 0.084        | 0.140            | 0.013        | 0.027        | 2.9                     | 5.7         | 10.0        | 60.0         | 120.0        | 200.0            | 18.6        | 38.6        |
| Elderly (≥65)          | 62          | 6.1         | 0.001                               | 0.002        | 0.006        | 0.012        | 0.014        | 0.049            | 0.005        | 0.009        | 1.4                     | 2.9         | 8.6         | 17.1         | 20.0         | 70.0             | 7.1         | 12.9        |
| <b>TOTAL</b>           | <b>2152</b> | <b>100</b>  | <b>0.003</b>                        | <b>0.007</b> | <b>0.020</b> | <b>0.051</b> | <b>0.083</b> | <b>0.266</b>     | <b>0.022</b> | <b>0.058</b> | <b>4.3</b>              | <b>10.0</b> | <b>28.6</b> | <b>72.9</b>  | <b>118.6</b> | <b>380.0</b>     | <b>31.4</b> | <b>82.9</b> |
| <b>Minors (&lt;18)</b> | <b>378</b>  | <b>17.5</b> | <b>0.005</b>                        | <b>0.014</b> | <b>0.030</b> | <b>0.072</b> | <b>0.126</b> | <b>0.241</b>     | <b>0.030</b> | <b>0.053</b> | <b>7.1</b>              | <b>20.0</b> | <b>42.9</b> | <b>102.9</b> | <b>180.0</b> | <b>344.3</b>     | <b>42.9</b> | <b>75.7</b> |
| Children (0-9)         | 190         | 8.8         | 0.008                               | 0.02         | 0.042        | 0.102        | 0.173        | 0.269            | 0.038        | 0.055        | 11.4                    | 28.6        | 60.0        | 145.7        | 247.1        | 384.3            | 54.3        | 78.6        |
| Adolescents (10-17)    | 188         | 8.7         | 0.004                               | 0.01         | 0.023        | 0.049        | 0.076        | 0.19             | 0.022        | 0.051        | 5.7                     | 14.3        | 32.9        | 70.0         | 108.6        | 271.4            | 31.4        | 72.9        |
| <b>Adults (≥18)</b>    | <b>1774</b> | <b>82.5</b> | <b>0.003</b>                        | <b>0.007</b> | <b>0.017</b> | <b>0.046</b> | <b>0.078</b> | <b>0.296</b>     | <b>0.021</b> | <b>0.058</b> | <b>4.3</b>              | <b>10.0</b> | <b>24.3</b> | <b>65.7</b>  | <b>111.4</b> | <b>422.9</b>     | <b>30.0</b> | <b>82.9</b> |
| Young adults (18-30)   | 782         | 36.3        | 0.003                               | 0.008        | 0.022        | 0.052        | 0.087        | 0.332            | 0.025        | 0.071        | 4.3                     | 11.4        | 31.4        | 74.3         | 124.3        | 474.3            | 35.7        | 101.4       |
| Adults (31-50)         | 664         | 30.9        | 0.003                               | 0.007        | 0.017        | 0.041        | 0.079        | 0.22             | 0.02         | 0.048        | 4.3                     | 10.0        | 24.3        | 58.6         | 112.9        | 314.3            | 28.6        | 68.6        |
| Older adults (51-64)   | 211         | 9.8         | 0.002                               | 0.004        | 0.01         | 0.03         | 0.056        | 0.113            | 0.014        | 0.045        | 2.9                     | 5.7         | 14.3        | 42.9         | 80.0         | 161.4            | 20.0        | 64.3        |
| Elderly (≥65)          | 117         | 5.5         | 0.001                               | 0.003        | 0.007        | 0.013        | 0.048        | 0.067            | 0.008        | 0.014        | 1.4                     | 4.3         | 10.0        | 18.6         | 68.6         | 95.7             | 11.4        | 20.0        |

<sup>1.</sup> Calculations at the 99<sup>th</sup> percentiles when the number of subjects is lower than 300 (children, adolescents, older adults and elderly) have been indicated with grey colour, as those results may not be statistically robust and should be interpreted cautiously [1]

**Table S6.** Likelihood of exceeding ADI of nitrite from total nitrite intake from processed meat products.

| Level of nitrite intake | Odds Ratio | Std. Err. | z     | P>z   | [95% Conf. Interval] |          |
|-------------------------|------------|-----------|-------|-------|----------------------|----------|
| Age group               |            |           |       |       |                      |          |
| 31-50                   | 0.777991   | 0.194701  | -1    | 0.316 | 0.476379             | 1.270566 |
| 51-64                   | 0.6998     | 0.317109  | -0.79 | 0.431 | 0.287911             | 1.700942 |
| 65+                     | 0.238563   | 0.285731  | -1.2  | 0.231 | 0.022809             | 2.495178 |
| Sex                     | 1.285699   | 0.370155  | 0.87  | 0.383 | 0.731268             | 2.260485 |
| Weight                  | 0.999971   | 0.008643  | 0     | 0.997 | 0.983173             | 1.017056 |
| Employment status       |            |           |       |       |                      |          |
| Pension                 | 0.725481   | 0.553252  | -0.42 | 0.674 | 0.162742             | 3.234091 |
| Unemployed              | 0.894391   | 0.231454  | -0.43 | 0.666 | 0.538579             | 1.485268 |
| Total energy intake     | 1.000468   | 0.000113  | 4.14  | 0     | 1.000246             | 1.000689 |
| Sodium intake category  |            |           |       |       |                      |          |
| >=1500 & <2300          | 2.672544   | 2.743197  | 0.96  | 0.338 | 0.357454             | 19.98156 |
| >=2300                  | 3.117198   | 3.242189  | 1.09  | 0.274 | 0.405912             | 23.93849 |
| Med diet category       |            |           |       |       |                      |          |
| MD>=23                  | 0.567615   | 0.134508  | -2.39 | 0.017 | 0.356734             | 0.903157 |

**Table S7.** Proportion of population per frequency of consumption of processed meat products, as reported in HNNHS, among (a) consumers and (b) consumers with total nitrite intake exceeding the ADI of 0.07mg/kw bw/day.

| Frequency of consumption of processed meat products | (a)<br>Consumers (%) | (b)<br>Consumers with total nitrite intake ≥ADI (%) |
|-----------------------------------------------------|----------------------|-----------------------------------------------------|
| Less than once a month                              | 3.0                  | 0                                                   |
| 1 to 3 times per month                              | 22.95                | 0                                                   |
| once a week                                         | 54.32                | 6.29                                                |
| 2-4 times a week                                    | 17.34                | 39.16                                               |
| 5-6 times a week                                    | 1.65                 | 16.78                                               |
| every day                                           | 0.48                 | 19.58                                               |
| 2 to 3 times a day                                  | 0.20                 | 12.59                                               |
| 4 to 5 times a day                                  | 0.05                 | 4.90                                                |
| 5 to 6 times a day                                  | 0.01                 | 0.70                                                |
| Total                                               | 100.00               | 100.00                                              |

**Table S8.** Consumers with total nitrite intake from processed meat products above the ADI of nitrite (0.07mg/kg bw/day) per sex and age group in number of individuals (n), as a percentage of individuals of the same age group [ $a=(n/N) \times 100$ ] and as a percentage of total number of individuals exceeding ADI (n=143) [ $b=(n/143) \times 100$ ].

| Age group                         | N           | Consumers with nitrite intake above ADI |                                                     |                                           |
|-----------------------------------|-------------|-----------------------------------------|-----------------------------------------------------|-------------------------------------------|
|                                   |             | n                                       | (a)<br>% of consumers within the same sex/age group | (b)<br>% of total consumers exceeding ADI |
| <b>Females</b>                    | <b>1144</b> | <b>56</b>                               | <b>4.9</b>                                          | <b>39.2</b>                               |
| Children (0-9y)                   | 85          | 10                                      | 11.8                                                | 7.0                                       |
| Adolescents (10-17y)              | 85          | 5                                       | 5.9                                                 | 3.5                                       |
| Young adults (18-30y)             | 442         | 26                                      | 5.9                                                 | 18.2                                      |
| Adults (31-50y)                   | 348         | 12                                      | 3.4                                                 | 8.4                                       |
| Older adults (51-64y)             | 129         | 2                                       | 1.6                                                 | 1.4                                       |
| Elderly ( $\geq 65y$ )            | 55          | 1                                       | 1.8                                                 | 0.7                                       |
| <b>Males</b>                      | <b>1001</b> | <b>87</b>                               | <b>8.7</b>                                          | <b>60.8</b>                               |
| Children (0-9y)                   | 105         | 19                                      | 18.1                                                | 13.3                                      |
| Adolescents (10-17y)              | 101         | 7                                       | 6.9                                                 | 4.9                                       |
| Young adults (18-30y)             | 338         | 27                                      | 8.0                                                 | 18.9                                      |
| Adults (31-50y)                   | 313         | 28                                      | 8.9                                                 | 19.6                                      |
| Older adults (51-64y)             | 82          | 6                                       | 7.3                                                 | 4.2                                       |
| Elderly ( $\geq 65y$ )            | 62          | 0                                       | 0.0                                                 | 0.0                                       |
| <b>Total</b>                      | <b>2152</b> | <b>143</b>                              | <b>6.6</b>                                          | <b>100.0</b>                              |
| <b>&lt;18 years</b>               | <b>378</b>  | <b>41</b>                               | <b>10.9</b>                                         | <b>28.7</b>                               |
| Children (0-9y)                   | 190         | 29                                      | 15.3                                                | 20.3                                      |
| Adolescents (10-17y)              | 188         | 12                                      | 6.4                                                 | 8.4                                       |
| <b><math>\geq 18</math> years</b> | <b>1774</b> | <b>102</b>                              | <b>5.7</b>                                          | <b>71.3</b>                               |
| Young adults (18-30y)             | 782         | 53                                      | 6.8                                                 | 37.1                                      |
| Adults (31-50y)                   | 664         | 40                                      | 6.0                                                 | 28.0                                      |
| Older adults (51-64y)             | 211         | 8                                       | 3.8                                                 | 5.6                                       |
| Elderly ( $\geq 65y$ )            | 117         | 1                                       | 0.9                                                 | 0.7                                       |

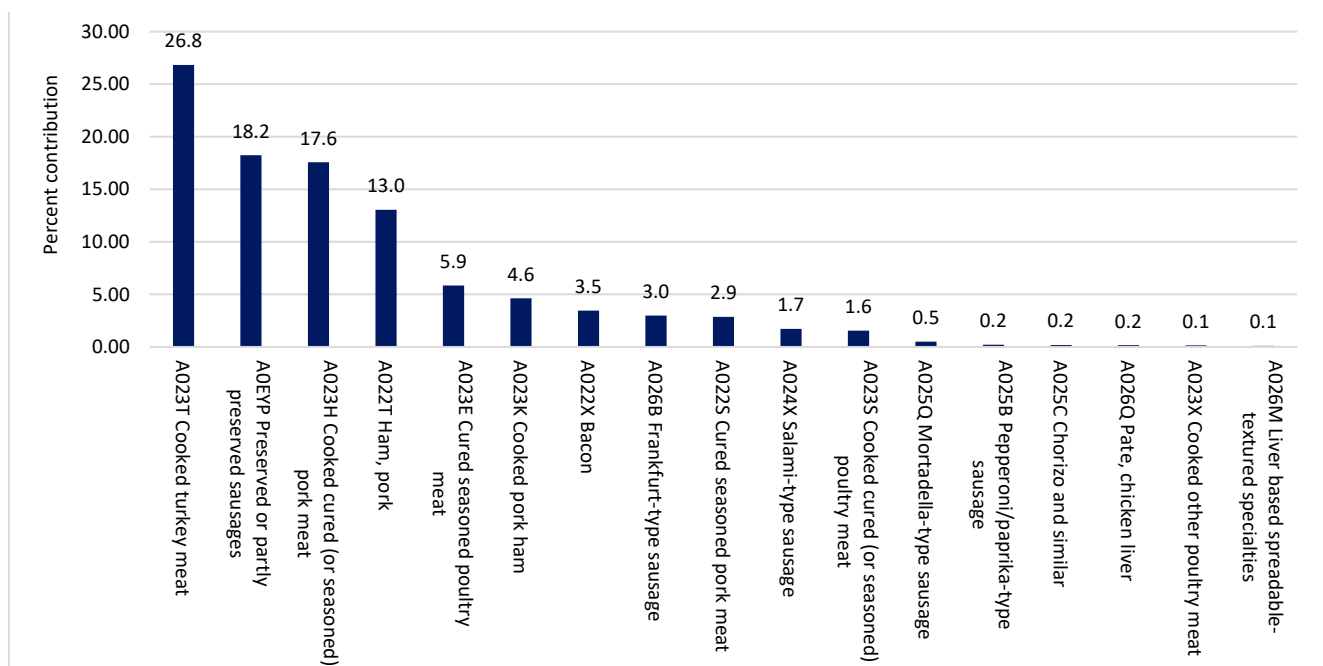

**Figure S1.** Main FoodEx2 group contribution (%) to total nitrite intake among processed meat products.

**Table S9.** Contribution (%) of meat type and FoodEx2 food groups to total nitrite exposure per age group.

| FOODEX CATEGORY                                   | Age group (years) |       |       |       |       |       | TOTAL |
|---------------------------------------------------|-------------------|-------|-------|-------|-------|-------|-------|
| Food Group (if different than FOODEX Category)    |                   |       |       |       |       |       |       |
| Food Subgroup (if any)                            |                   |       |       |       |       |       |       |
| FoodEx2 Category                                  | 0-9               | 10-17 | 18-30 | 31-50 | 51-64 | 65+   |       |
| PRESERVED MEAT                                    |                   |       |       |       |       |       |       |
| Pork meat                                         | 51.91             | 39.05 | 38.23 | 40.45 | 46.77 | 39.57 | 41.53 |
| Pork meat, ham                                    | 21.84             | 18.01 | 17.19 | 14.82 | 21.47 | 21.43 | 17.66 |
| A022T Ham, pork                                   | 17.98             | 14.72 | 11.05 | 12.26 | 12.53 | 20.90 | 13.04 |
| A023K Cooked pork ham                             | 3.86              | 3.29  | 6.14  | 2.55  | 8.94  | 0.53  | 4.62  |
| Pork meat, bacon                                  | 4.40              | 3.43  | 3.32  | 3.60  | 2.34  | 0.63  | 3.46  |
| A022X Bacon                                       | 4.40              | 3.43  | 3.32  | 3.60  | 2.34  | 0.63  | 3.46  |
| Pork meat, other                                  | 25.67             | 17.61 | 17.72 | 22.04 | 22.95 | 17.51 | 20.41 |
| A023H Cooked cured (or seasoned) pork meat        | 23.65             | 15.91 | 14.37 | 19.25 | 18.71 | 16.72 | 17.56 |
| A022S Cured seasoned pork meat                    | 2.02              | 1.70  | 3.35  | 2.79  | 4.24  | 0.79  | 2.85  |
| Poultry meat                                      | 29.23             | 30.07 | 39.08 | 35.28 | 22.27 | 21.07 | 34.39 |
| Poultry meat, turkey                              | 25.87             | 29.54 | 37.35 | 34.24 | 19.99 | 20.01 | 32.68 |
| A023T Cooked turkey meat                          | 24.99             | 27.88 | 28.21 | 29.23 | 12.70 | 17.80 | 26.83 |
| A023E Cured seasoned poultry meat                 | 0.88              | 1.66  | 9.14  | 5.01  | 7.29  | 2.21  | 5.85  |
| Poultry meat, other (chicken)                     | 3.36              | 0.53  | 1.73  | 1.04  | 2.27  | 1.06  | 1.71  |
| A023S Cooked cured (or seasoned) poultry meat     | 2.55              | 0.53  | 1.70  | 0.99  | 2.27  | 1.06  | 1.56  |
| A023X Cooked other poultry meat                   | 0.82              | 0.00  | 0.03  | 0.05  | 0.00  | 0.00  | 0.15  |
| SAUSAGES                                          | 17.82             | 30.88 | 22.68 | 23.92 | 30.94 | 39.36 | 23.82 |
| A024X Salami-type sausage                         | 3.96              | 0.39  | 0.95  | 2.11  | 1.95  | 0.16  | 1.72  |
| A025B Pepperoni/paprika-type sausage              | 0.71              | 0.00  | 0.12  | 0.14  | 0.31  | 0.17  | 0.22  |
| A025C Chorizo and similar                         | 0.00              | 0.32  | 0.35  | 0.01  | 0.03  | 0.02  | 0.18  |
| A025Q Mortadella-type sausage                     | 0.00              | 0.00  | 0.36  | 0.26  | 4.01  | 1.96  | 0.50  |
| A026B Frankfurt-type sausage                      | 1.88              | 0.82  | 4.12  | 3.42  | 0.18  | 0.05  | 2.98  |
| A0EYP Preserved or partly preserved sausages      | 11.26             | 29.35 | 16.78 | 17.99 | 24.46 | 37.00 | 18.23 |
| MEAT SPECIALTIES                                  | 1.04              | 0.00  | 0.01  | 0.35  | 0.02  | 0.00  | 0.26  |
| A026M Liver based spreadable-textured specialties | 0.00              | 0.00  | 0.01  | 0.35  | 0.02  | 0.00  | 0.10  |
| A026Q Pate, chicken liver                         | 1.04              | 0.00  | 0.00  | 0.00  | 0.00  | 0.00  | 0.16  |

**Table S10.** Qualitative evaluation of influence of uncertainties on the dietary exposure estimated.

| <b>Sources of uncertainties</b> |                                                                                                                                                | <b>Direction</b> |
|---------------------------------|------------------------------------------------------------------------------------------------------------------------------------------------|------------------|
| 1.                              | Regulatory maximum level exposure assessment scenario (food categories authorized at MPL according to Annex II to Regulation (EC) No 1333/2008 | +                |
| 2.                              | Extrapolation from recipes to their ingredients.                                                                                               | ±                |
| 3.                              | Uncertainty of nitrate-to-nitrite conversion factor                                                                                            | ±                |
| 4.                              | Misclassification of meat products; incorrect FoodEx coding and mismatch with food categories of Regulation (EC) 1333/2008                     | ±                |
| 5.                              | No use of procession factors                                                                                                                   | ±                |

+, uncertainty with potential to cause overestimation of exposure

-, uncertainty with potential to cause underestimation of exposure

## Reference

1. EFSA Use of the EFSA Comprehensive European Food Consumption Database in Exposure Assessment. *EFSA J.* **2011**, 9, doi:10.2903/j.efsa.2011.2097.
